# Supplementary material for: An organic ligand promoting the electrocatalytic activity of cobalt oxide for the hydrogen evolution reaction
Source: Royal Society of Chemistry journal article supplement (doi:10.1039/c9se00371a), 2019-01-01
Supplement: c9se00371a1.pdf [file c9se00371a1.pdf]

Supplementary Information

**Organic ligand promoting the electrocatalytic activity of cobalt oxide for  
hydrogen evolution reaction**

Chien-Hong Chen<sup>a,\*</sup> Tzung-Wen Chiou<sup>b,\*</sup> Han-Chun Chang,<sup>a</sup> Wei-Liang Li,<sup>b</sup> Chi-  
Yen Tung<sup>b</sup> and Wen-Feng Liaw<sup>b</sup>

<sup>a</sup>Department of Medical Applied Chemistry, Chung Shan Medical University and Department of  
Medical Education, Chung Shan Medical University Hospital, Taichung 40201, Taiwan

<sup>b</sup>Department of Chemistry, National Tsing Hua University, Hsinchu 30013, Taiwan

Email: [cchwind@csmu.edu.tw](mailto:cchwind@csmu.edu.tw) (CHC) and [twchiou@mx.nthu.edu.tw](mailto:twchiou@mx.nthu.edu.tw) (TWC)

## Experimental section

**Chemicals.**  $\text{CoCl}_2 \cdot 6\text{H}_2\text{O}$  (99.9 %) and NaOH (99.99 %) were bought from Alfa Aesar. 2,2'-dipyridylamine (Hdap) was purchased from Tokyo Chemical Industry. Methanol solvent was bought from Duksan. Sodium sulfate ( $\text{Na}_2\text{SO}_4$ , >99.0%) was purchased from Fluka. Platinum on carbon (40 wt. % Pt/C, Pt on an activated carbon support) and Nafion® perfluorinated resin solution (5 wt. % in lower aliphatic alcohols and water, contains 15-20% water) were bought from Sigma-Aldrich. All chemicals were used directly without further purification. Ultrapure water (18.2 M $\Omega$ ) used in the experiments was supplied by a Millipore System (Direct-Q® 3).

**Electrode Preparation.** The electrodeposition was carried out with a standard three-electrode electrochemical cell containing glassy carbon disk (surface area: 0.0707 cm<sup>2</sup>), a graphite rod (L 100 mm, diam. 3 mm) and a saturated calomel electrode (SCE) as the working, auxiliary and reference electrodes, respectively. The electrolyte solution of  $\text{Co}_3\text{O}_4$ -dpa-C was prepared;  $\text{CoCl}_2 \cdot 6\text{H}_2\text{O}$  (0.024 g, 0.1 mmol), Hdpa (0.017g, 0.1 mmol) and NaOH (0.004g, 0.1 mmol) were first dissolved in 5 mL methanol and then the solution after the addition of  $\text{Na}_2\text{SO}_4$  (14.204 g, 0.1 mol) was added water to 100 mL. Similarly, the preparation of  $\text{Co}_3\text{O}_4$ -C electrolyte solution was followed above the procedure without Hdpa. The  $\text{Co}_3\text{O}_4$ -C and  $\text{Co}_3\text{O}_4$ -dpa-C films were prepared through controlled potential electrolysis at -1.644 V vs SCE with violently stirring until the constant current ( $\sim 240 \text{ mA cm}^{-2}$ ) for 24 h at ambient temperature. After deposition, the films by careful rinse with water were directly used for electrochemistry tests. 40 wt.% Pt-C (20 mg) was dispersed in a 5 mL mixture solution containing 0.5 mL 5% Nafion solution and 4.5 mL methanol, followed by sonication for 30 min to obtain a homogeneous catalyst ink. The catalyst ink was

loaded on the surfaces of the glassy carbon disk electrode to achieve  $2.8 \text{ mg cm}^{-2}$ .

**Physical characterization.** Powder X-ray diffraction (pXRD) data were obtained using a Bruker D8 X-ray Powder Diffractometer with a Cu K- $\alpha$  radiation source in the range  $2\theta = 5\text{-}80^\circ$ . Scanning electron microscopy (SEM) images and energy-dispersive X-ray spectra (EDX) were obtained with a JSM 7000F microscope (JEOL) equipped with an Oxford EDX system. X-ray photoelectron spectroscopy (XPS) spectra were collected on a ULVAC-PHI XPS spectrometer equipped with a monochromatized 1486.6 eV Al K $\alpha$  X-ray line source directed  $45^\circ$  with respect to the sample surface. The spectra were registered at a base pressure of  $<5 \times 10^{-10}$  torr. Low-resolution survey scans were acquired with a 100  $\mu\text{m}$  spot size between the binding energies of 1-1100 eV. High-resolution scans with a resolution of 0.1 eV were collected between 280-292 (for C), 392-408 (for N), 525-540 (for O) and 770-810 (for Co) eV. IR and ATR-IR spectra were recorded on a ALPHA FT-IR spectrometer and ALPHA Eco ATR with ZnSe crystal, respectively. NMR spectra were recorded on a Varian Unity Inova 500 spectrometer.

**ESI-MS and ICP-MS experiments.**  $\text{Co}_3\text{O}_4$ -dpa-C film on the glassy carbon electrode was scraped in 10 mL methanol solution containing a magnetic stirring bar. The solution was sonicated for 1 h and then stirred for overnight. The clarified part of solution was collected for electrospray ionization mass spectrometer (ESI-MS) and inductively coupled plasma-mass spectrometry (ICP-MS) experiments. Coldspray ionization time-of-flight mass (CSI-TOF MS) spectral data were collected on a JMS-T100LP4G (JEOL) mass spectrometer equipped with the CSI source. Typical measurement conditions are as follows: needle voltage: 0 kV, orifice 1 voltage: 100 V, ring lens voltage: 10 V, spray temperature:  $0^\circ\text{C}$ . ICP-MS was performed on a Agilent

7500ce. Dry samples were dissolved in concentrated  $\text{HNO}_3$ .

**Electrochemical measurements.** All electrochemical experiments were performed with a CH Instrument 621b potentiostat. Fundamental electrochemical testing was carried out, consisting of samples as the working electrode, a graphite rod (L 100 mm, diam. 3 mm) auxiliary electrode and a saturated calomel electrode (SCE) reference electrode. All potentials reported in this paper were converted from vs SCE to vs reversible hydrogen electrode (RHE).  $\text{RHE} = \text{SCE} + 0.244 + 0.059 \times \text{pH}$ . In all experiments, the iR compensation was performed by CHI model 621b software. The linear sweep voltammetry (LSV) curves were obtained in 1.0 M  $\text{NaOH}_{(\text{aq})}$  at a scan rate of 2 mV/s. Tafel slopes were calculated using the Polarization curves by plotting overpotential against  $\log(\text{current density})$ . Controlled potential electrolysis (CPE) experiments were conducted in 1.0 M  $\text{NaOH}_{(\text{aq})}$  stirred constantly. The auxiliary electrode in CPE cell was separated from the solution of the working electrode by a medium-porosity sintered-glass frit. The electrochemically active surface area (ECSA) was evaluated in terms of double-layer capacitance. Cyclic voltammogram (CV) scans were conducted in static solution by sweeping the potential from the more positive to negative potential and back at 8 different scan rates: 2, 4, 8, 12, 16, 20, 40 and 80  $\text{mV s}^{-1}$ . This range is typically a 0.1 V potential window centered on the open-circuit potential (OCP) of the system. The capacitance was determined from the tenth cyclic voltammetry curve of each scan rate. The electrochemical double-layer capacitance,  $C_{\text{DL}}$ , as given by  $i_c = \nu C_{\text{DL}}$  ( $i_c$ : current density from CV,  $\nu$ : scan rate). The specific capacitance for a flat surface is generally found to be in the range of 20-60  $\text{mF cm}^{-2}$ . We used a value of 40  $\text{mF cm}^{-2}$  in the following calculations of the electrochemical active surface area. The electrochemical impedance spectroscopy (EIS) measurements were carried out in a frequency range of 0.1 Hz to 100 kHz with

an amplitude of 5 mV at an overpotential of 270 mV. The curve fitting was performed by Zview2 software.

**Determinations of Faradaic Efficiency and TOF.** Quantification of the produced H<sub>2</sub> gas was performed by gas chromatography (SRI 8610C) equipped with a molecular sieves (MS-13x) column and helium ionization detector (HID). Helium was used as the carrier gas. Calibration curves were built by the injection of the known amounts of pure H<sub>2</sub>. The amounts of H<sub>2</sub> dissolved in the solution were corrected by the Henry's law ( $K_H = 7.8 \times 10^{-4}$  mol/atm·L for H<sub>2</sub>).

*Faradaic efficiency (%)* = [Charge (CPE)/2/96485]×100%/[Volume (H<sub>2</sub> gas of GC detection)/24.5]

TON = [Charge (CPE)/2/96485]×[Faradaic efficiency (%)]/[number of catalyst (mol)]

The number of catalyst was determined from ICP analysis.

TOF = [TON]/[time of CPE] (s<sup>-1</sup>)

a.

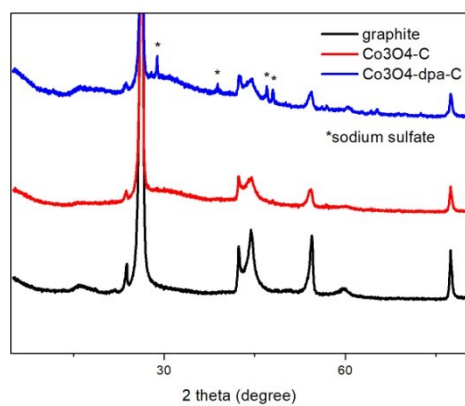

b.

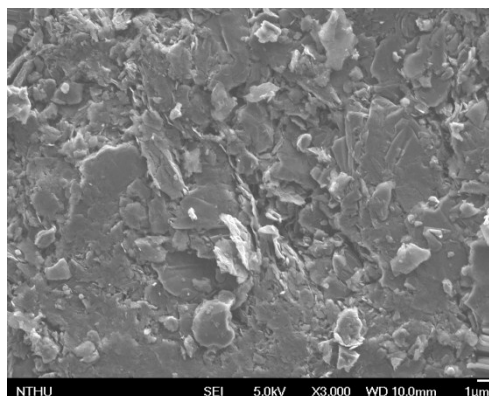

c.

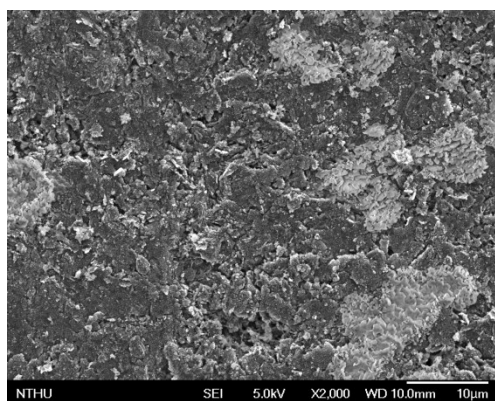

d.

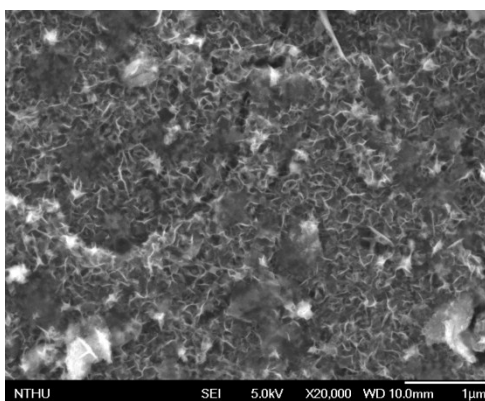

**Figure S1.** (a) The magnified X-ray diffraction patterns of fresh graphite, Co<sub>3</sub>O<sub>4</sub>-C and Co<sub>3</sub>O<sub>4</sub>-dpa-C. The stars are the diffraction peaks of residual sodium sulfate. SEM images of (b) fresh graphite plate and (c,d) Co<sub>3</sub>O<sub>4</sub>-C.

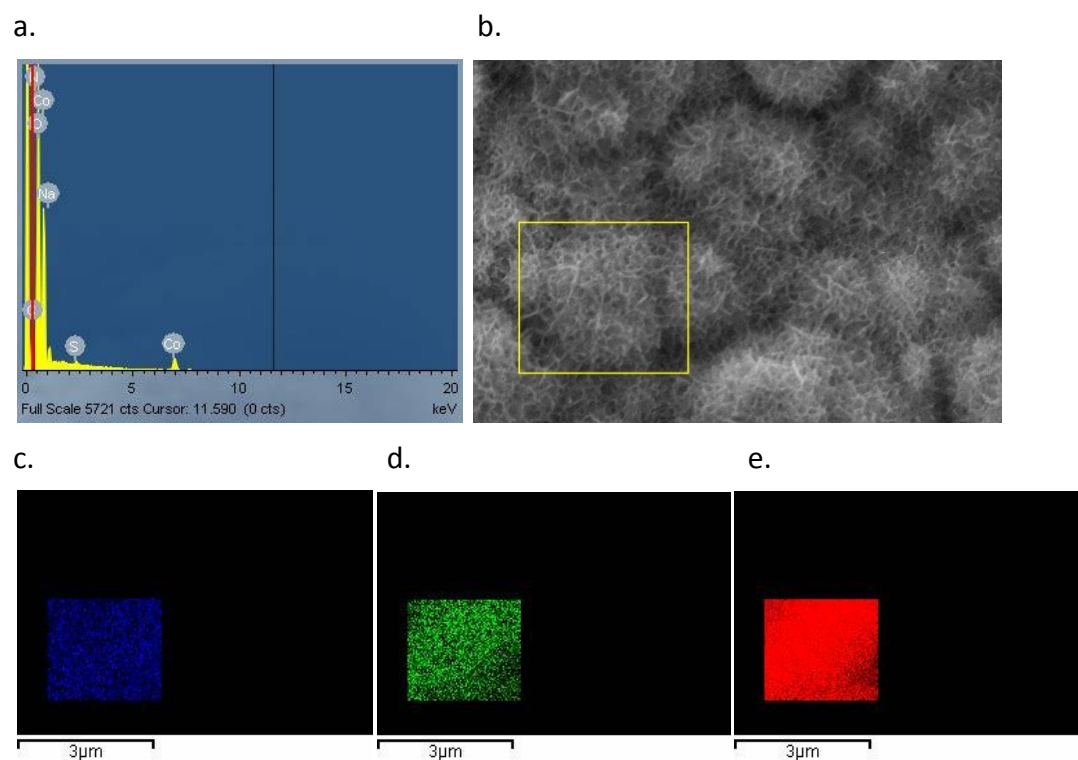

**Figure S2.** (a) EDX spectrum and (b-e) SEM-EDX elemental maps (Co, N and O elements are shown as blue, green and red, respectively) of  $\text{Co}_3\text{O}_4\text{-dpa-C}$ .

a.

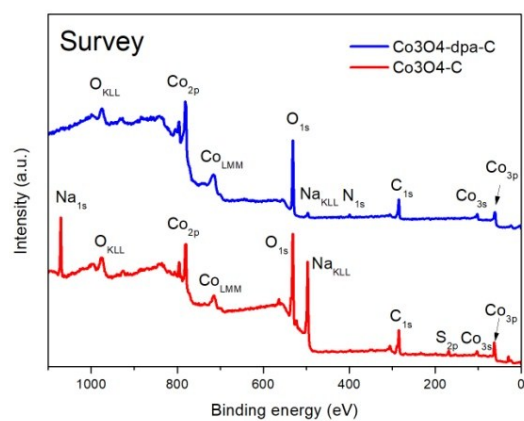

b.

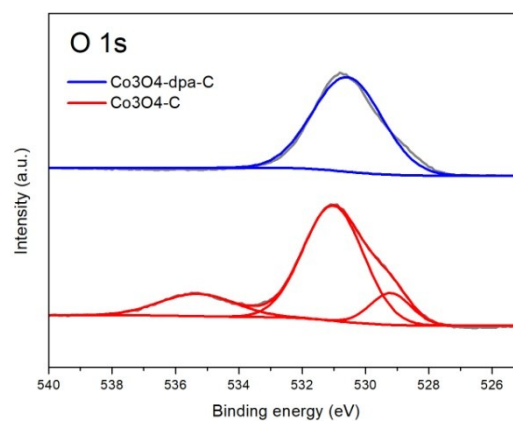

c.

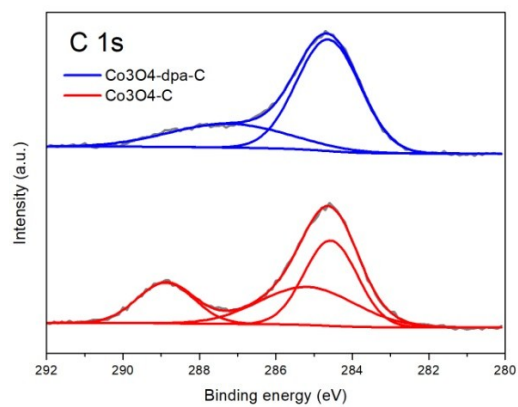

**Figure S3.** (a) Survey, (b) O 1s and (c) C 1s XPS spectra of Co<sub>3</sub>O<sub>4</sub>-dpa-C and Co<sub>3</sub>O<sub>4</sub>-C.

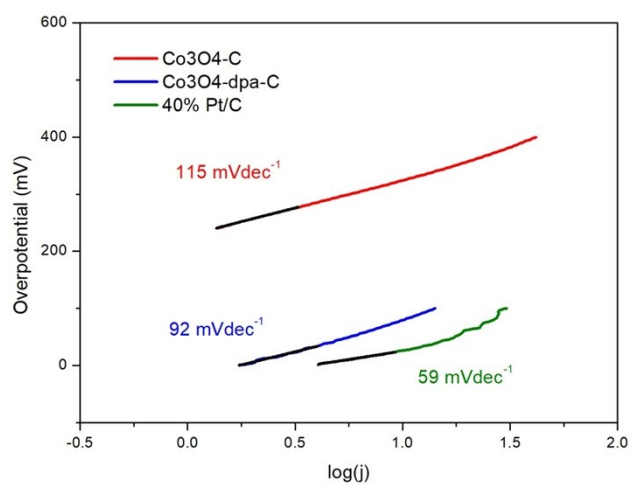

**Figure S4.** The corresponding Tafel plots of Co<sub>3</sub>O<sub>4</sub>-C (red), Co<sub>3</sub>O<sub>4</sub>-dpa-C (blue) and 40% Pt/C electrodes (green) in 1.0 M NaOH<sub>(aq)</sub> (scan rate 2 mVs<sup>-1</sup>).

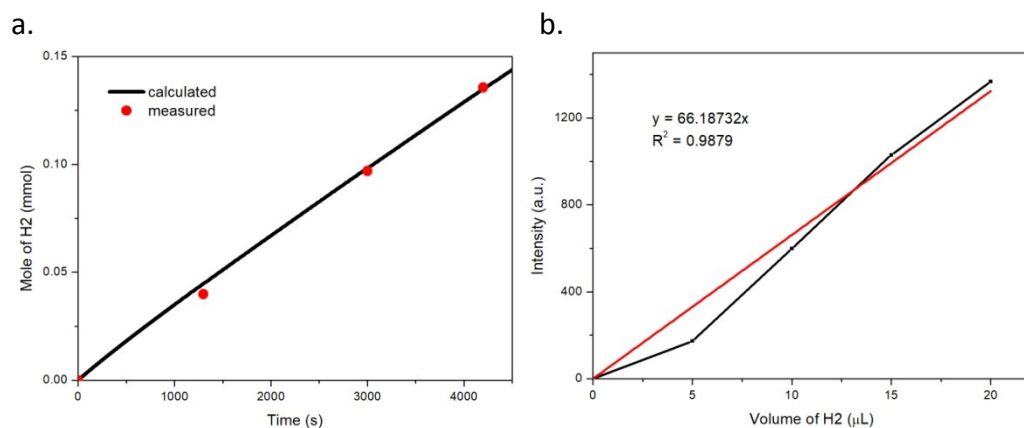

**Figure S5.** (a) The amount of  $H_2$  gas obtained by theoretical calculation (red) and experimental measurements (black) versus time for the controlled potential electrolysis of 1.0 M  $NaOH_{(aq)}$  employing  $Co_3O_4$ -dpa-C as working electrode at applied overpotential of 270 mV. (b) The calibration curve of  $H_2$ .

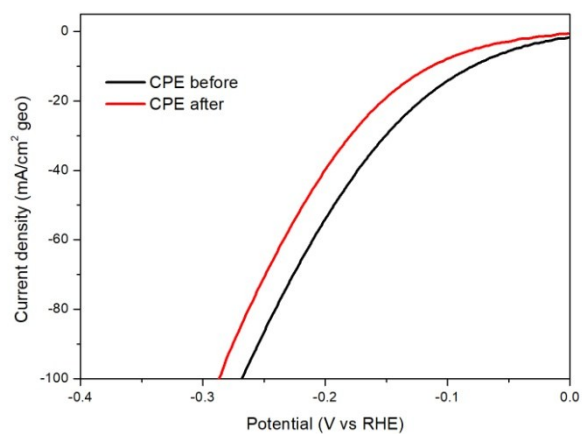

**Figure S6.** LSV curves of the Co<sub>3</sub>O<sub>4</sub>-dpa-C before and after CPE for 45 h in 1.0 M NaOH<sub>(aq)</sub> at an applied overpotential of 270 mV (scan rate 2 mVs<sup>-1</sup>).

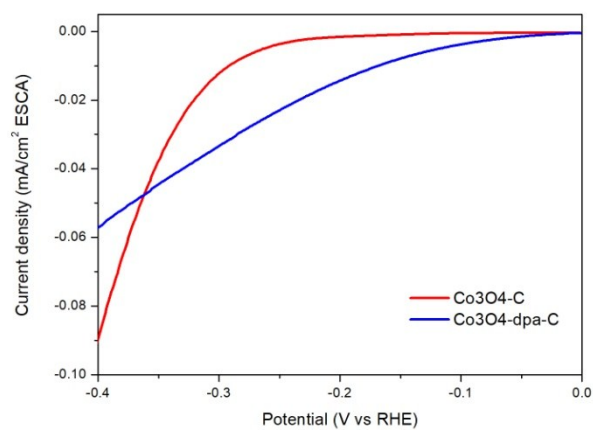

**Figure S7.** The LSV curves from Fig. 2a normalized to the electrochemical active surface area (ECSA).

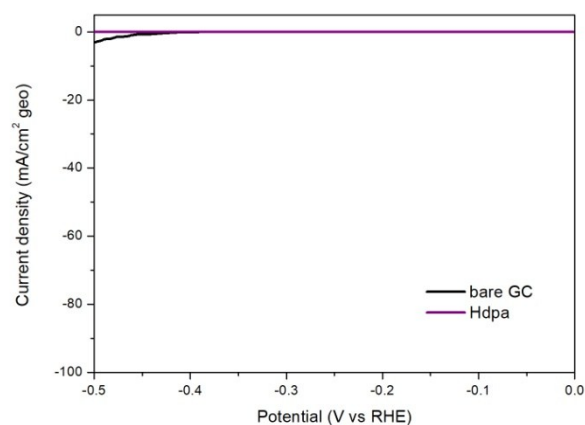

**Figure S8.** LSV curves of glassy carbon (black) and Hdpa (purple) electrodes in 1.0 M NaOH<sub>(aq)</sub> (scan rate 2 mVs<sup>-1</sup>). Hdpa electrode was prepared by homogeneously depositing 0.2 mg of Hdpa in methanol solution onto the glassy carbon electrode

a.

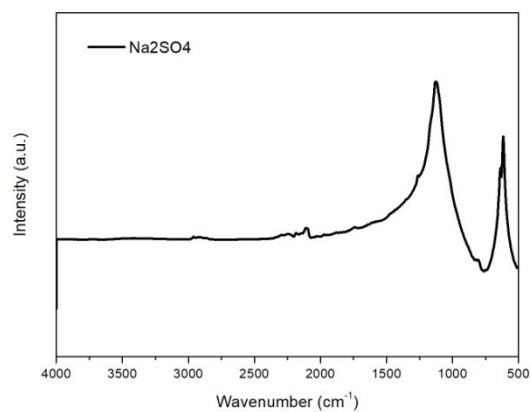

b.

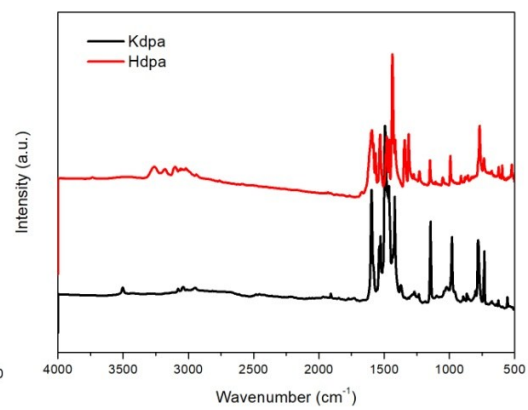

**Figure S9.** IR spectra of (a)  $\text{Na}_2\text{SO}_4$ , (b) Kdpa and Hdpa (in KBr).

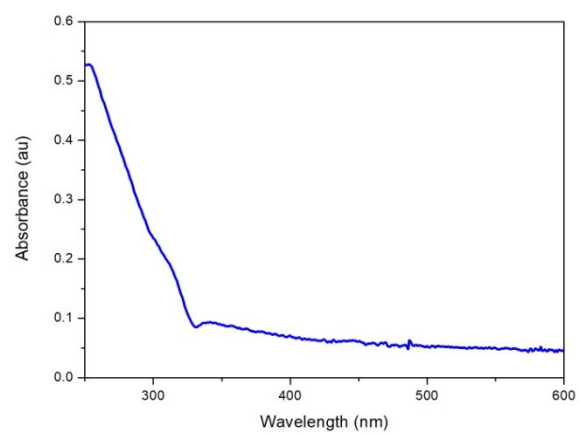

**Figure S10.** UV-vis spectrum of the extracting Co<sub>3</sub>O<sub>4</sub>-dpa-C in methanol solution.

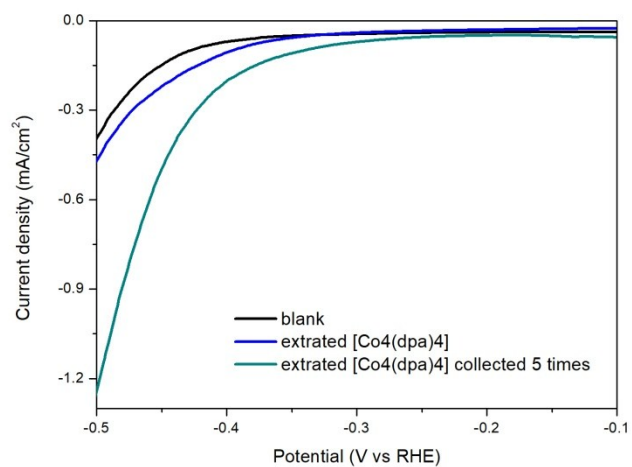

**Figure S11.** LSV curves of blank (black), the extracted [Co<sub>4</sub>(dpa)<sub>4</sub>]-cores (blue) and the extracted [Co<sub>4</sub>(dpa)<sub>4</sub>]-cores collected 5 times (dark cyan) in 1.0 M NaOH H<sub>2</sub>O-methanol solution (volume ratio = 19:1) (scan rate 2 mVs<sup>-1</sup>).

**Table S1.** Selected the non-precious HER catalysts in alkaline condition.

| Catalysts                                          | $\eta_{10}$<br>(mV) | Tafel<br>(mV/dec) | Condition | Electrode <sup>a</sup> | References                          |
|----------------------------------------------------|---------------------|-------------------|-----------|------------------------|-------------------------------------|
| Carbon-based electrodes:                           |                     |                   |           |                        |                                     |
| Co <sub>3</sub> O <sub>4</sub> -dpa-C              | 53                  | 92                | 1 M NaOH  | GC                     | This work                           |
| Ni-C-N NSs                                         | 30.8                |                   | 1M KOH    | GC                     | J. Am. Chem. Soc., 2016, 14546.     |
| MoP/SNG                                            | 49                  | 54                | 1 M KOH   | GC                     | ACS Catal., 2017, 3030.             |
| WC/W <sub>2</sub> C                                | 56                  | 59                | 1 M KOH   | GC                     | J. Mater. Chem. A, 2018, 15395.     |
| Mo <sub>2</sub> C@NC                               | 60                  |                   | 1 M KOH   | GC                     | Angew. Chem. Int. Ed., 2015, 10752. |
| CuNDs/Ni <sub>3</sub> S <sub>2</sub>               | 60                  | 76.2              | 1 M KOH   | CF                     | J. Am. Chem. Soc., 2018, 610.       |
| Co <sub>3</sub> S <sub>4</sub> PNS <sub>vac</sub>  | 63                  | 58                | 1 M KOH   | GC                     | ACS Catal., 2018, 8077.             |
| MoSe <sub>2</sub> /MO <sub>x</sub>                 | 64                  |                   | 1 M KOH   | GC                     | Adv. Energy Mater., 2018, 1801764.  |
| Ni(OH) <sub>2</sub> @Ni                            | 68                  | 97                | 1 M KOH   | CC                     | J. Mater. Chem. A, 2017, 7744.      |
| Ni <sub>3</sub> N@CQDs                             | 69                  | 108               | 1 M KOH   | GC                     | ACS Nano, 2018, 4148.               |
| MoP-NC                                             | 69                  | 52                | 1 M KOH   | CC                     | Adv. Funct. Mater., 2018, 1801527.  |
| MoC                                                | 77                  | 50                | 1 M KOH   | GC                     | J. Mater. Chem. A, 2016, 6006.      |
| Ni/WC                                              | 77                  | 68.6              | 1 M KOH   | GC                     | Energy Environ. Sci., 2018, 2114.   |
| Mo <sub>3</sub> P/Mo                               | 78                  | 43                | 1 M KOH   | GC                     | Angew. Chem. Int. Ed., 2018, 14139. |
| CoMnP@C                                            | 81                  | 55.53             | pH = 14   | GC                     | Energy Environ. Sci., 2017, 788.    |
| Zn <sub>0.3</sub> Co <sub>2.7</sub> S <sub>4</sub> | 85                  |                   | 1 M KOH   | GC                     | J. Am. Chem. Soc., 2016, 1359.      |
| NiFeO <sub>x</sub>                                 | 88                  | 150               | 1 M KOH   | CFP                    | Nat. Commun., 2015, 7261.           |
| Ni-MoS <sub>2</sub>                                | 98                  | 60                | 1 M KOH   | CC                     | Energy Environ. Sci., 2016, 2789.   |
| NiO/Ni-CNT                                         | <100                | 82                | 1 M KOH   | RDE                    | Nat. Commun., 2014, 4695.           |
| TiO <sub>2</sub> /Co                               | 106                 | 62                | 1 M KOH   | CF                     | Angew. Chem. Int. Ed., 2017, 2960.  |
| CoP/NC                                             | 129                 | 58                | 1 M KOH   | GC                     | ACS Catal., 2017, 3824.             |
| MoNC <sub>2</sub>                                  | 132                 | 90                | 0.1 M KOH | GC                     | Angew. Chem. Int. Ed., 2017, 16086. |
| MoB/g-C <sub>3</sub> N <sub>4</sub>                | 133                 | 46                | 1 M KOH   | GC                     | Angew. Chem. Int. Ed., 2018, 496.   |
| MoC <sub>x</sub>                                   | 151                 | 59                | 1 M KOH   | GC                     | Nat. Commun., 2015, 6512.           |
| CoMoS <sub>x</sub>                                 | ~158 (5)            |                   | 0.1M KOH  | GC                     | Nat. Mater., 2016, 197.             |
| Fe/FeO <sub>x</sub>                                | 160                 | 93                | 1 M NaOH  | GC                     | Dalton Trans., 2018, 7128.          |
| Co-NRCNT                                           | 160 (1)             |                   | 1 M KOH   | GC                     | Angew. Chem. Int. Ed., 2014, 4372.  |
| CoN <sub>x</sub> /C                                | 170                 | 75                | 1 M KOH   | GC                     | Nat. Commun., 2015, 7992.           |
| α-Mo <sub>2</sub> C                                | 176                 |                   | 1 M KOH   | GC                     | J. Mater. Chem. A, 2015, 8361.      |
| Co <sub>2</sub> P/WC@NC                            | 180                 | 90                | 1 M KOH   | GC                     | ChemSusChem, 2018, 1082.            |
| c-CoSe <sub>2</sub>                                | 190                 | 85                | 1 M KOH   | CC                     | Adv. Mater., 2016, 7527.            |
| NiS <sub>2</sub> /MoS <sub>2</sub>                 | 204                 | 65                | 1 M KOH   | GC                     | ACS Catal., 2017, 6179.             |
| NiMo <sub>3</sub> S <sub>4</sub>                   | 257                 | 98                | 0.1M KOH  | GC                     | Angew. Chem. Int. Ed., 2016, 15240. |

| Non-carbon-based electrodes: <i>(continue)</i>      |          |        |           |         |                                   |
|-----------------------------------------------------|----------|--------|-----------|---------|-----------------------------------|
| MoNi <sub>4</sub>                                   | 15       | 30     | 1 M KOH   | NF      | Nat. Commun., 2017, 15437.        |
| MoNi/CoMoO <sub>3</sub>                             | 18       | 35     | 1M KOH    | NF      | J. Mater. Chem. A, 2018, 15558.   |
| Co-Co <sub>2</sub> Mo <sub>3</sub> O <sub>8</sub>   | 25       | 33     | 1 M KOH   | NF      | ACS Catal., 2018, 5062.           |
| Porous-MoO <sub>2</sub>                             | 27       | 41     | 1 M KOH   | NF      | Adv. Mater., 2016, 3785.          |
| NiCoP                                               | 32       | 37     | 1 M KOH   | NF      | Nano Lett., 2016, 7718.           |
| N–NiCo <sub>2</sub> S <sub>4</sub> NWs              | 41       | 37     | 1 M KOH   | NF      | Nat. Commun., 2018, 1425.         |
| WO <sub>2</sub> HN                                  | 48       | 43     | 1 M KOH   | NF      | J. Mater. Chem. A, 2017, 9655.    |
| Ni <sub>5</sub> P <sub>4</sub>                      | 49       | 98     | 1 M NaOH  | Ti      | Energy Environ. Sci., 2015, 1027. |
| Ni <sub>3</sub> N <sub>1-x</sub>                    | 55       | 54     | 1M KOH    | NF      | Adv. Sci., 2018, 1800406.         |
| Cu <sub>95</sub> Ti <sub>5</sub>                    | 60       | 110    | 0.1 M KOH |         | Nat. Commun., 2015, 6567.         |
| (Co <sub>1-x</sub> Fe <sub>x</sub> ) <sub>2</sub> P | 64       | 45     | 1 M KOH   |         | Energy Environ. Sci., 2016, 2257. |
| Ni <sub>2</sub> P                                   | 69       | 118    | 1 M NaOH  | Ti      | Energy Environ. Sci., 2015, 1027. |
| CoMnP                                               | 76       | 52     | 1 M KOH   | Ti      | ACS Catal., 2017, 98.             |
| Fe-CoP                                              | 78       | 92     | 1M KOH    | NF      | Adv. Sci., 2018, 1800949.         |
| Ni <sub>2</sub> P/CeO <sub>2</sub>                  | 84 (20)  | 87     | 1 M KOH   | Ti mesh | Inorg. Chem., 2018, 548.          |
| Co(OH) <sub>2</sub> @PA                             | 90       | 91.6   | 1 M NaOH  | NF      | Adv. Mater., 2015, 7051.          |
| meso-FeS <sub>2</sub>                               | 96       | 78     | 0.1 M KOH | NF      | J. Am. Chem. Soc., 2017, 13604.   |
| N-NiO                                               | 100      | 112.58 | 1 M KOH   | NF      | ChemSusChem, 2018, 1020.          |
| Vc-FeP                                              | 108      | 62     | 1 M KOH   | Ti      | ChemSusChem, 2017, 1509.          |
| Co/Co <sub>3</sub> O <sub>4</sub>                   | 129 (20) | 44     | 1 M KOH   | NF      | Nano Lett., 2015, 6015.           |

<sup>a</sup> GC: glassy carbon, CC: carbon cloth, RDE: rotating disk electrode, CFP: carbon fiber paper, CF: carbon fiber, NF: nickel foam.

**Table S2.** TOF values of Co<sub>3</sub>O<sub>4</sub>-dpa-C and other catalysts.

| Catalysts                             | TOF<br>(s <sup>-1</sup> ) | $\eta$<br>(mV) | Condition | electrode       | References                          |
|---------------------------------------|---------------------------|----------------|-----------|-----------------|-------------------------------------|
| Co <sub>3</sub> O <sub>4</sub> -dpa-C | 0.95                      | 270            | 1M NaOH   | GC              | This work                           |
| CoO NR                                | 0.41                      | 100            | 1M KOH    | CFP             | Nat. Commun., 2017, 1509.           |
| Fe-CoP                                | 0.069                     | 200            | 1M KOH    | NF              | Adv. Sci., 2018, 1800949.           |
| CFeCoP                                | 0.0024                    | 100            | 1M NaOH   | GP <sup>a</sup> | ACS Appl. Energy Mater, 2018, 5298. |
| MoNi/CoMoO <sub>3</sub>               | 0.56                      | 100            | 1M KOH    | NF              | J. Mater. Chem. A, 2018, 15558.     |
| NiCoP                                 | 8.93                      | 100            | 1M KOH    | NF              | Nano Lett., 2016, 7718.             |
| Ni-C-N NSs                            | 8.52                      | 200            | 1M KOH    | GC              | J. Am. Chem. Soc., 2016, 14546.     |
| Ni <sub>5</sub> P <sub>4</sub>        | 0.79                      | 100            | 1 M NaOH  | Ti              | Energy Environ. Sci., 2015, 1027.   |
|                                       | 2.9                       | 200            |           |                 |                                     |
| Ni <sub>2</sub> P                     | 0.004                     | 100            | 1 M NaOH  | Ti              | Energy Environ. Sci., 2015, 1027.   |
|                                       | 0.014                     | 200            |           |                 |                                     |
| NiMo                                  | 0.2                       | 100            | 2M KOH    | Ti mesh         | ACS Catal., 2013, 166.              |
| Ni-MoS <sub>2</sub>                   | 0.32                      | 150            | 1M KOH    | CC              | Energy Environ. Sci., 2016, 2789.   |
| MoNC <sub>2</sub>                     | 0.148                     | 50             | 0.1M KOH  | GC              | Angew. Chem. Int. Ed., 2017, 16086. |
|                                       | 0.465                     | 100            |           |                 |                                     |
|                                       | 1.46                      | 150            |           |                 |                                     |
| $\alpha$ -Mo <sub>2</sub> C           | 0.5                       | 176            | 1M KOH    | GC              | J. Mater. Chem. A, 2015, 8361.      |
|                                       | 0.9                       | 200            |           |                 |                                     |
|                                       | 2.5                       | 250            |           |                 |                                     |

<sup>a</sup>GP: graphite plates.
